# Supplementary material
Source: PubMed Central journal article supplement (PMC7424275)
Supplement: gbaa039_suppl_onlinesupplement.pdf [file gbaa039_suppl_onlinesupplement.pdf]

## **ONLINE SUPPLEMENTARY MATERIALS**

**Title:** The Education of Multiple Family Members and the Life Course Pathways to Cognitive Impairment

**Journal:** Journal of Gerontology – Series B, Social Sciences

**Authors:**

Jenjira J. Yahirun, Dept. of Sociology, Bowling Green State University

Sindhu Vasireddy, School of Geography and Sustainable Development, University of St. Andrews

Mark D. Hayward, Department of Sociology, University of Texas at Austin

**Supplementary Table S1. Results from Logistic Regression Models Predicting Onset of Cognitive Impairment, Adults aged 65+, across different methods of handling missing data**

|                                                 | <b>Multiple Imputation then deletion</b> | <b>Listwise deletion</b> | <b>Multiple Imputation</b> |
|-------------------------------------------------|------------------------------------------|--------------------------|----------------------------|
| <b><u>Respondent characteristics</u></b>        |                                          |                          |                            |
| <b>Respondent's education (&lt;High school)</b> |                                          |                          |                            |
| High school                                     | -0.584***<br>[0.061]                     | -0.585***<br>[0.061]     | -0.544***<br>[0.084]       |
| Some college                                    | -0.826***<br>[0.083]                     | -0.821***<br>[0.0831]    | -0.589***<br>[0.122]       |
| College +                                       | -0.796***<br>[0.090]                     | -0.801***<br>[0.090]     | -0.696***<br>[0.115]       |
| Age                                             | 0.126***<br>[0.006]                      | 0.126***<br>[0.006]      | 0.119***<br>[0.008]        |
| Female                                          | 0.057<br>[0.056]                         | 0.059<br>[0.056]         | 0.12<br>[0.074]            |
| <b>Race (/NH White)</b>                         |                                          |                          |                            |
| Black                                           | 0.476***<br>[0.076]                      | 0.476***<br>[0.076]      | 0.481***<br>[0.104]        |
| Other                                           | 0.194<br>[0.202]                         | 0.193<br>[0.202]         | 0.261<br>[0.262]           |
| Hispanic                                        | 0.454***<br>[0.085]                      | 0.456***<br>[0.085]      | 0.275*<br>[0.119]          |
| <b>Marital Status (/Married)</b>                |                                          |                          |                            |
| Separated/Divorced                              | 0.272**<br>[0.097]                       | 0.273**<br>[0.097]       | 0.339**<br>[0.117]         |
| Widowed                                         | 0.118<br>[0.061]                         | 0.124*<br>[0.061]        | 0.13<br>[0.081]            |
| Never married                                   | 0.094<br>[0.310]                         | 0.096<br>[0.310]         | 0.221<br>[0.385]           |
| Number of Kids                                  | -0.005<br>[0.012]                        | -0.002<br>[0.012]        | -0.011<br>[0.017]          |
| Proxy                                           | 1.413***<br>[0.075]                      | 1.4180***<br>[0.075]     | 1.510***<br>[0.096]        |
| <b>Birth cohort (/AHEAD (&lt;1924))</b>         |                                          |                          |                            |
| CODA (1924-1930)                                | 0.085<br>[0.077]                         | 0.088<br>[0.076]         | 0.200*<br>[0.097]          |
| HRS (1931-1941)                                 | 0.267**<br>[0.102]                       | 0.272**<br>[0.102]       | 0.318*<br>[0.137]          |

**(cont.) Supplementary Table S1. Results from Logistic Regression Models Predicting Onset of Cognitive Impairment, Adults aged 65+, across different methods of handling missing data**

|                                                            | <b>Multiple Imputation then deletion</b> | <b>Listwise deletion</b> | <b>Multiple Imputation</b> |
|------------------------------------------------------------|------------------------------------------|--------------------------|----------------------------|
| WB (1942-1947)                                             | 0.325<br>[0.264]                         | 0.331<br>[0.264]         | 0.031<br>[0.291]           |
| <b><u>Early life conditions</u></b>                        |                                          |                          |                            |
| Parent's education (<High school)                          |                                          |                          |                            |
| High school                                                | -0.134<br>[0.090]                        | -0.135<br>[0.090]        | -0.299**<br>[0.114]        |
| Some college                                               | -0.289<br>[0.166]                        | -0.290<br>[0.166]        | -0.610***<br>[0.184]       |
| College +                                                  | 0.017<br>[0.145]                         | 0.016<br>[0.145]         | -0.038<br>[0.193]          |
| Poor childhood health (/good)                              | 0.292**<br>[0.094]                       | 0.293**<br>[0.094]       | 0.336**<br>[0.104]         |
| Southern birth (/non-Southern)                             | 0.277***<br>[0.056]                      | 0.279***<br>[0.056]      | 0.190*<br>[0.076]          |
| <b><u>Offspring education (/No children w/college)</u></b> |                                          |                          |                            |
| Some offspring w/college                                   | -0.201**<br>[0.074]                      | -0.203**<br>[0.074]      | -0.197*<br>[0.100]         |
| All offspring w/college                                    | -0.307***<br>[0.079]                     | -0.314***<br>[0.078]     | -0.379***<br>[0.101]       |
| Constant                                                   | -12.583***<br>[0.494]                    | -12.558***<br>[0.4931]   | -12.020***<br>[0.671]      |
| Sample size (person-years)                                 | 60,120                                   | 52,794                   | 57,650                     |

Source: *HRS, 2000-12*

Note: All models account for clustering at household level.

\*\*\* $p < .001$ ; \*\* $p < .01$ ; \* $p < .05$

**Supplementary Table S2: Descriptive Statistics at for all Person-Waves, Adults age 65+ (N=52,794)**

|                                            | <i>Percent/<br/>Mean</i> | <i>SE</i> |                                                        | <i>Percent/Mean</i> | <i>SE</i> |
|--------------------------------------------|--------------------------|-----------|--------------------------------------------------------|---------------------|-----------|
| <b><u>Respondent's characteristics</u></b> |                          |           | <b><u>Respondent early life conditions</u></b>         |                     |           |
| Cognitive health                           |                          |           | Parental Education                                     |                     |           |
| Not impaired                               | 97.9                     |           | < High school                                          | 67.0                |           |
| Impaired                                   | 2.1                      |           | High school                                            | 20.1                |           |
| Age                                        | 75.5                     | 0.03      | Some college                                           | 6.3                 |           |
| Birth cohort                               |                          |           | College+                                               | 6.5                 |           |
| AHEAD (<1924)                              | 20.7                     |           | Poor childhood health                                  | 6.0                 |           |
| CODA (1924-1930)                           | 25.6                     |           | Southern birth                                         | 32.8                |           |
| HRS (1931-1941)                            | 48.9                     |           |                                                        |                     |           |
| WB (1942-1947)                             | 4.8                      |           |                                                        |                     |           |
| Gender                                     |                          |           | <b><u>Offspring characteristics</u></b>                |                     |           |
| Men                                        | 42.3                     |           | Offspring education                                    |                     |           |
| Women                                      | 57.7                     |           | No offspring w/college                                 | 11.5                |           |
| Race                                       |                          |           | Some offspring w/college                               | 45.1                |           |
| NH White                                   | 80.0                     |           | All offspring w/college                                | 43.4                |           |
| Black                                      | 11.3                     |           | Received transfers from 1+ child                       | 2.6                 |           |
| Other                                      | 1.5                      |           | Proximity to offspring                                 | 0.7                 |           |
| Hispanic                                   | 7.2                      |           | No child cores/lives w/in 10miles                      | 35.1                |           |
| Marital status                             |                          |           | 1+ child cores/lives w/in 10miles                      | 64.9                |           |
| Married/Partnered                          | 61.1                     |           |                                                        |                     |           |
| Separated/Divorced                         | 8.2                      |           | <b><u>Respondent's health behaviors/conditions</u></b> |                     |           |
| Widowed                                    | 30.0                     |           | Ever smoked                                            | 8.6                 |           |
| Never married                              | 0.7                      |           | Exercise at baseline                                   | 31.3                |           |
| Respondent education                       |                          |           | Ever diagnosed - diabetes                              | 22.8                |           |
| < High school                              | 26.8                     |           | Ever diagnosed - heart disease                         | 33.3                |           |
| High school                                | 35.3                     |           | Ever had stroke                                        | 9.4                 |           |
| Some college                               | 19.1                     |           | CES-D                                                  | 1.4                 | 0.01      |
| College+                                   | 18.8                     |           |                                                        |                     |           |
| Number of kids                             | 3.5                      | 0.01      |                                                        |                     |           |
| Proxy status                               | 5.5                      |           |                                                        |                     |           |

Source: HRS, 2000-12

**Supplementary Table S3. Results from Logistic Regression Models Predicting Onset of Cognitive Impairment, Adults aged 65+, by Different Measures of Offspring Education**

|                                                      | <u>Share of college completion</u> | <u>Share of high school completion</u> | <u>Most educated child</u> | <u>Mean education</u> | <u>Education of eldest child</u> |
|------------------------------------------------------|------------------------------------|----------------------------------------|----------------------------|-----------------------|----------------------------------|
| <b><u>Offspring Education</u></b>                    |                                    |                                        |                            |                       |                                  |
| Offspring college completion/(no children w/college) |                                    |                                        |                            |                       |                                  |
| Some offspring w/college                             | -0.201**<br>[0.074]                |                                        |                            |                       |                                  |
| All offspring w/college                              | -0.307***<br>[0.079]               |                                        |                            |                       |                                  |
| Offspring high school completion/(no offspring w/HS) |                                    |                                        |                            |                       |                                  |
| Some offspring w/HS                                  |                                    | -0.174<br>[0.233]                      |                            |                       |                                  |
| All offspring w/HS                                   |                                    | -0.441<br>[0.228]                      |                            |                       |                                  |
| Most educated child (years schooling)                |                                    |                                        | -0.050***<br>[0.013]       |                       |                                  |
| Mean education of offspring (years schooling)        |                                    |                                        |                            | -0.051***<br>[0.014]  |                                  |
| Education of eldest child (years schooling)          |                                    |                                        |                            |                       | -0.046***<br>[0.012]             |
| <b><u>Other offspring characteristics</u></b>        |                                    |                                        |                            |                       |                                  |
| Received transfers from offspring (/None)            | 0.035<br>[0.126]                   | 0.043<br>[0.125]                       | 0.020<br>[0.128]           | 0.026<br>[0.127]      | 0.013<br>[0.134]                 |
| 1+ child cores/lives w/in 10miles (/None)            | 0.066<br>[0.054]                   | 0.08<br>[0.054]                        | 0.062<br>[0.055]           | 0.071<br>[0.055]      | 0.05<br>[0.059]                  |

(cont.) Supplementary Table S3. Results from Logistic Regression Models Predicting Onset of Cognitive Impairment, Adults aged 65+, by Different Measures of Offspring Education

|                                          | <u>Share of college completion</u> | <u>Share of high school completion</u> | <u>Most educated child</u> | <u>Mean education</u> | <u>Education of eldest child</u> |
|------------------------------------------|------------------------------------|----------------------------------------|----------------------------|-----------------------|----------------------------------|
| <b><u>Respondent characteristics</u></b> |                                    |                                        |                            |                       |                                  |
| Education (<High school)                 |                                    |                                        |                            |                       |                                  |
| High school                              | -0.595***<br>[0.061]               | -0.571***<br>[0.061]                   | -0.580***<br>[0.062]       | -0.571***<br>[0.062]  | -0.595***<br>[0.064]             |
| Some college                             | -0.827***<br>[0.083]               | -0.841***<br>[0.082]                   | -0.805***<br>[0.084]       | -0.791***<br>[0.084]  | -0.797***<br>[0.086]             |
| College +                                | -0.797***<br>[0.090]               | -0.826***<br>[0.088]                   | -0.769***<br>[0.091]       | -0.760***<br>[0.092]  | -0.759***<br>[0.093]             |
| Age                                      | 0.126***<br>[0.006]                | 0.124***<br>[0.006]                    | 0.128***<br>[0.006]        | 0.126***<br>[0.006]   | 0.128***<br>[0.006]              |
| Female                                   | 0.057<br>[0.056]                   | 0.052<br>[0.056]                       | 0.064<br>[0.057]           | 0.063<br>[0.057]      | 0.065<br>[0.059]                 |
| Race (/NH White)                         |                                    |                                        |                            |                       |                                  |
| Black                                    | 0.476***<br>[0.076]                | 0.464***<br>[0.076]                    | 0.456***<br>[0.079]        | 0.467***<br>[0.078]   | 0.492***<br>[0.081]              |
| Other                                    | 0.194<br>[0.202]                   | 0.159<br>[0.203]                       | 0.217<br>[0.210]           | 0.208<br>[0.208]      | 0.214<br>[0.217]                 |
| Hispanic                                 | 0.454***<br>[0.085]                | 0.409***<br>[0.087]                    | 0.455***<br>[0.087]        | 0.444***<br>[0.087]   | 0.475***<br>[0.089]              |
| Marital Status (/Married)                |                                    |                                        |                            |                       |                                  |
| Separated/Divorced                       | 0.272*<br>[0.097]                  | 0.265**<br>[0.097]                     | 0.272*<br>[0.099]          | 0.275*<br>[0.099]     | 0.267*<br>[0.103]                |
| Widowed                                  | 0.118<br>[0.061]                   | 0.120*<br>[0.061]                      | 0.116<br>[0.062]           | 0.115<br>[0.062]      | 0.105<br>[0.064]                 |

(cont.) Supplementary Table S3. Results from Logistic Regression Models Predicting Onset of Cognitive Impairment, Adults aged 65+, by Different Measures of Offspring Education

|                                     | <u>Share of college completion</u> | <u>Share of high school completion</u> | <u>Most educated child</u> | <u>Mean education</u> | <u>Education of eldest child</u> |
|-------------------------------------|------------------------------------|----------------------------------------|----------------------------|-----------------------|----------------------------------|
| Never married                       | -0.094<br>[0.310]                  | 0.098<br>[0.308]                       | -0.116<br>[0.353]          | -0.010<br>[0.347]     | -0.124<br>[0.370]                |
| Number of Kids                      | -0.005<br>[0.012]                  | -0.014<br>[0.012]                      | 0.001<br>[0.011]           | -0.009<br>[0.012]     | -0.012<br>[0.012]                |
| Birth cohort (/AHEAD (<1924)        |                                    |                                        |                            |                       |                                  |
| CODA (1924-1930)                    | 0.086<br>[0.076]                   | 0.080<br>[0.076]                       | 0.095<br>[0.082]           | 0.075<br>[0.077]      | 0.088<br>[0.079]                 |
| HRS (1931-1941)                     | 0.268**<br>[0.102]                 | 0.245*<br>[0.102]                      | 0.271**<br>[0.104]         | 0.243**<br>[0.104]    | 0.271**<br>[0.107]               |
| WB (1942-1947)                      | 0.326<br>[0.264]                   | 0.286<br>[0.264]                       | 0.332<br>[0.271]           | 0.288<br>[0.271]      | 0.266<br>[0.295]                 |
| Proxy status                        | 1.413***<br>[0.075]                | 1.408***<br>[0.075]                    | 1.424***<br>[0.076]        | 1.433***<br>[0.076]   | 1.484***<br>[0.078]              |
| <b><u>Early life conditions</u></b> |                                    |                                        |                            |                       |                                  |
| Poor childhood health (/good)       | 0.292**<br>[0.094]                 | -0.125<br>[0.090]                      | 0.314**<br>[0.100]         | 0.295**<br>[0.096]    | 0.281**<br>[0.099]               |
| Southern birth (/non-Southern)      | 0.277***<br>[0.056]                | -0.3<br>[0.165]                        | 0.283***<br>[0.057]        | 0.281***<br>[0.056]   | 0.267***<br>[0.058]              |
| Parent's education (<High school)   |                                    |                                        |                            |                       |                                  |
| High school                         | -0.135<br>[0.090]                  | 0.019<br>[0.145]                       | -0.119<br>[0.091]          | -0.121<br>[0.091]     | -0.120<br>[0.094]                |
| Some college                        | -0.290<br>[0.166]                  | 0.285**<br>[0.095]                     | -0.282<br>[0.167]          | -0.267<br>[0.166]     | -0.310<br>[0.174]                |
| College +                           | 0.016<br>[0.145]                   | 0.262***<br>[0.056]                    | 0.040<br>[0.145]           | 0.051<br>[0.145]      | 0.081<br>[0.148]                 |

**(cont.) Supplementary Table S3. Results from Logistic Regression Models Predicting Onset of Cognitive Impairment, Adults aged 65+, by Different Measures of Offspring Education**

|          | <u>Share of college completion</u> | <u>Share of high school completion</u> | <u>Most educated child</u> | <u>Mean education</u> | <u>Education of eldest child</u> |
|----------|------------------------------------|----------------------------------------|----------------------------|-----------------------|----------------------------------|
| Constant | -12.583***<br>[0.493]              | -12.247***<br>[0.535]                  | -12.266***<br>[0.526]      | -12.140***<br>[0.529] | -12.320***<br>[0.538]            |
| AIC      | 68790.2                            | 68796.6                                | 66317.9                    | 67194.9               | 63358.2                          |
| BIC      | 69482.4                            | 69488.8                                | 66981.1                    | 67859.0               | 64018.3                          |

Source: *HRS, 2000-12*

Note: All models account for clustering at household level.

\*\*\* $p < .001$ ; \*\* $p < .01$ ; \* $p < .05$
